# Supplementary material for: Integrating Bayesian variable selection with Modular Response Analysis to infer biochemical network topology
Source: PubMed Central journal article supplement (PMC3726398; doi:10.1186/1752-0509-7-57), 2013-07-06
Supplement: 1752-0509-7-57-S3.pdf [file 1752-0509-7-57-S3.pdf]

# The MAPK model

Tapesh Santra, Walter Kolch, Boris N. Kholodenko

...

**ODE simulation:** The ODE model for our simulation experiment is shown in Tab.1.

Table 1: MAPK model

| Receptor module                                |                                         |                                                                                                                                                                                                                                                         |
|------------------------------------------------|-----------------------------------------|---------------------------------------------------------------------------------------------------------------------------------------------------------------------------------------------------------------------------------------------------------|
| EGF binds to EGFR                              | $R + L = RL$                            | $ka = 0.001, kd = 0.01$                                                                                                                                                                                                                                 |
| EGF-EGFR complex dimerization                  | $RL + RL = RD$                          | $ka = 0.001, kd = 0.01$                                                                                                                                                                                                                                 |
| EGF-EGFR complex phosphorylation               | $RD \rightarrow pRD$                    | $k = 0.01$                                                                                                                                                                                                                                              |
| EGFR complex dephosphorylation                 | $pRD \rightarrow RD$                    | $\frac{Vm_1}{(Km_1 + pRD)}$ ; $Vm_1 = 1, Km_1 = 10$                                                                                                                                                                                                     |
| <b>Adapter module</b>                          |                                         |                                                                                                                                                                                                                                                         |
| Phosphorylation of Shc by EGFR                 | $Shc \rightarrow pShc; pRD$             | $\frac{kcat_1 \times pRD \times Shc}{(K_1 + Shc)}$ ; $kcat_1 = 0.1, K_1 = 5$                                                                                                                                                                            |
| Dephosphorylation of Shc                       | $pShc \rightarrow Shc$                  | $\frac{Vm_2 \times pShc}{(Km_2 + pShc)}$ ; $Vm_2 = 0.08, Km_2 = 200$                                                                                                                                                                                    |
| Shc binds to Grb2SOS complex                   | $pShc + GS = pShc-GS$                   | $ka = 0.001, kd = 0.01$                                                                                                                                                                                                                                 |
| ppERK phosphorylates and inhibits GS           | $GS \rightarrow iGS; ppERK$             | $\frac{kcat_9 \times GS \times ppERK}{(K_9 + GS)}$ ; $kcat_9 = 0.01, K_9 = 10$                                                                                                                                                                          |
| iGS dephosphorylation                          | $iGS \rightarrow GS$                    | $\frac{Vm_{10} iGS}{(Km_{71} + iGS)}$ ; $Vm_{10} = 0.05, Km_{71} = 10$                                                                                                                                                                                  |
| <b>Initiator module</b>                        |                                         |                                                                                                                                                                                                                                                         |
| Phosphorylation of RasGDP by Shc bound Grb2SOS | $RasGDP \rightarrow RasGTP; pShc-GS$    | $\frac{kcat_2 \times pShc \times GS \times RasGDP}{(K_2 + RasGDP)}$ ; $kcat_2 = 0.001, K_2 = 10$                                                                                                                                                        |
| Dephosphorylation of RasGTP                    | $RasGTP \rightarrow RasGDP$             | $\frac{Vm_3 RasGTP}{(Km_3 + RasGTP)}$ ; $Vm_3 = 0.1, Km_3 = 5$                                                                                                                                                                                          |
| <b>MAP3K module</b>                            |                                         |                                                                                                                                                                                                                                                         |
| Raf activation stage 1                         | $Raf \rightarrow aRaf; RasGTP, ppERK$   | $\frac{kcat_3 \times RasGTP \times Raf}{((K_{31} + Raf + aRaf \frac{K_{31}}{K_{32}})(1 + \frac{ppERK}{K_i}))}$ ; $kcat_3 = 0.1, K_{31} = 300, K_{32} = 20; K_i = 5$                                                                                     |
| Raf activation stage 2                         | $aRaf \rightarrow aaRaf; RasGTP, ppERK$ | $\frac{kcat_4 \times RasGTP \times aRaf}{((K_{31} + Raf + aRaf \frac{K_{31}}{K_{32}})(1 + \frac{ppERK}{K_i}))}$ ; $kcat_4 = 0.1, K_{31} = 300, K_{32} = 20; K_i = 5$                                                                                    |
| Raf deactivation stage 1                       | $aaRaf \rightarrow aRaf;$               | $\frac{Vm_4 \times aaRaf}{(Km_{41} + aaRaf + (aRaf \frac{Km_{41}}{Km_{42}}) + Raf \frac{Km_{41}}{Km_{43}})}$ ; $Vm_4 = 0.05, Km_{41} = 22, Km_{42} = 18; Km_{43} = 80$                                                                                  |
| Raf deactivation stage 1                       | $aRaf \rightarrow Raf;$                 | $\frac{Vm_5 \times aRaf}{(Km_{41} + aaRaf + (aRaf \frac{Km_{41}}{Km_{42}}) + Raf \frac{Km_{41}}{Km_{43}})}$ ; $Vm_5 = 0.05, Km_{41} = 22, Km_{42} = 18; Km_{43} = 80$                                                                                   |
| <b>MAP2K module</b>                            |                                         |                                                                                                                                                                                                                                                         |
| MEK phosphorylation                            | $MEK \rightarrow pMEK; aaRaf$           | $\frac{kcat_5 \times MEK \times aaRaf}{(K_{41} + MEK + pMEK \frac{K_{41}}{K_{42}})}$ ; $kcat_5 = 0.1, K_{41} = 300; K_{42} = 20$                                                                                                                        |
| MEK doublephosphorylation                      | $pMEK \rightarrow ppMEK; aaRaf$         | $\frac{kcat_6 \times pMEK \times aaRaf}{(K_{41} + MEK + pMEK \frac{K_{41}}{K_{42}})}$ ; $kcat_6 = 0.1, K_{41} = 300; K_{42} = 20$                                                                                                                       |
| MEK dephosphorylation stage 1                  | $ppMEK \rightarrow pMEK; ppERK$         | $\frac{Vm_6 \times ppMEK \times (1 + A \frac{ppERK}{K_{mp}})}{((Km_{51} + ppMEK + (pMEK \frac{Km_{51}}{Km_{52}}) + MEK \frac{Km_{51}}{Km_{53}}) * (1 + \frac{ppERK}{K_{mp}}))}$ ; $Vm_6 = 0.09, Km_{51} = 22, Km_{52} = 18; Km_{53} = 80; K_{mp} = 100$ |
| MEK dephosphorylation stage 2                  | $pMEK \rightarrow MEK; ppERK$           | $\frac{Vm_7 \times pMEK \times (1 + A \frac{ppERK}{K_{mp}})}{((Km_{51} + ppMEK + pMEK \frac{Km_{51}}{Km_{52}} + MEK \frac{Km_{51}}{Km_{53}}) * (1 + \frac{ppERK}{K_{mp}}))}$ ; $Vm_7 = 0.09, Km_{51} = 22, Km_{52} = 18; Km_{53} = 80; K_{mp} = 100$    |
| <b>MAPK module</b>                             |                                         |                                                                                                                                                                                                                                                         |
| ERK phosphorylation                            | $ERK \rightarrow pERK; ppMEK$           | $\frac{kcat_7 \times ERK \times ppMEK}{(K_{51} + ERK + pERK \frac{K_{51}}{K_{52}})}$ ; $kcat_7 = 0.1, K_{51} = 300; K_{52} = 20$                                                                                                                        |
| ERK doublephosphorylation                      | $pERK \rightarrow ppERK; ppMEK$         | $\frac{kcat_8 \times pERK \times ppMEK}{(K_{51} + ERK + pERK \frac{K_{51}}{K_{52}})}$ ; $kcat_8 = 0.1, K_{51} = 300; K_{52} = 20$                                                                                                                       |
| ERK dephosphorylation stage 1                  | $ppERK \rightarrow pERK$                | $\frac{Vm_8 \times ppERK}{(Km_{61} + ppERK + pERK \frac{Km_{61}}{Km_{62}} + ERK \frac{Km_{61}}{Km_{63}})}$ ; $Vm_8 = 0.05, Km_{61} = 22, Km_{62} = 18, Km_{63} = 80$                                                                                    |
| ERK dephosphorylation stage 2                  | $pERK \rightarrow ERK$                  | $\frac{Vm_9 \times pERK}{(Km_{61} + ppERK + pERK \frac{Km_{61}}{Km_{62}} + ERK \frac{Km_{61}}{Km_{63}})}$ ; $Vm_9 = 0.05, Km_{61} = 22, Km_{62} = 18, Km_{63} = 80$                                                                                     |

The initial concentrations for the MAPK model are given in Tab.2.

**siRNA knockdown experiments** siRNA knockdown of a gene results in attenuated level of the corresponding proteins. Therefore we simulated knockdown experiments by reducing the initial concentrations of the corresponding proteins. The initial concentrations regarding the knock down experiments are shown in Tab.3.

Table 2: Initial concentrations for the MAPK model

| Initial concentrations |                                    |
|------------------------|------------------------------------|
|                        | L=1                                |
|                        | R=100                              |
|                        | SHC = 300                          |
|                        | GS=100                             |
|                        | RasGDP =100                        |
|                        | RAF_total= Raf + aRaf+ aaRaf= 100  |
|                        | MEK_total = MEK + pMEK + ppMEK=100 |
|                        | ERK_total = ERK + pERK + ppERK=100 |

Table 3: Initial concentrations for the knockdown experiments

| <b>Replicate 1: 80% knockdown efficiency</b> |          |     |     |     |     |     |
|----------------------------------------------|----------|-----|-----|-----|-----|-----|
| Module:                                      | Exp. no. |     |     |     |     |     |
|                                              | 1        | 2   | 3   | 4   | 5   | 6   |
| R                                            | 20       | 100 | 100 | 100 | 100 | 20  |
| Shc                                          | 300      | 60  | 300 | 300 | 300 | 300 |
| RasGDP                                       | 100      | 100 | 20  | 100 | 100 | 100 |
| RAFtotal                                     | 100      | 100 | 100 | 20  | 100 | 100 |
| MEKtotal                                     | 100      | 100 | 100 | 100 | 20  | 100 |
| ERKtotal                                     | 100      | 100 | 100 | 100 | 100 | 20  |

  

| <b>Replicate 2: 60% knockdown efficiency</b> |          |     |     |     |     |     |
|----------------------------------------------|----------|-----|-----|-----|-----|-----|
| Module:                                      | Exp. no. |     |     |     |     |     |
|                                              | 1        | 2   | 3   | 4   | 5   | 6   |
| R                                            | 40       | 100 | 100 | 100 | 100 | 20  |
| Shc                                          | 300      | 120 | 300 | 300 | 300 | 300 |
| RasGDP                                       | 100      | 100 | 40  | 100 | 100 | 100 |
| RAFtotal                                     | 100      | 100 | 100 | 40  | 100 | 100 |
| MEKtotal                                     | 100      | 100 | 100 | 100 | 40  | 100 |
| ERKtotal                                     | 100      | 100 | 100 | 100 | 100 | 40  |

  

| <b>Replicate 3: 40% knockdown efficiency</b> |          |     |     |     |     |     |
|----------------------------------------------|----------|-----|-----|-----|-----|-----|
| Module:                                      | Exp. no. |     |     |     |     |     |
|                                              | 1        | 2   | 3   | 4   | 5   | 6   |
| R                                            | 60       | 100 | 100 | 100 | 100 | 20  |
| Shc                                          | 300      | 180 | 300 | 300 | 300 | 300 |
| RasGDP                                       | 100      | 100 | 60  | 100 | 100 | 100 |
| RAFtotal                                     | 100      | 100 | 100 | 60  | 100 | 100 |
| MEKtotal                                     | 100      | 100 | 100 | 100 | 60  | 100 |
| ERKtotal                                     | 100      | 100 | 100 | 100 | 100 | 60  |

**SDE simulation:** Each ordinary differential equation of the following form

$$\frac{dx}{dt} = V(\mathbf{x}) - D(\mathbf{x}) \quad (1)$$

was converted into the a stochastic differential equation of the following form [1]

$$\frac{dx}{dt} = V(\mathbf{x}) - D(\mathbf{x}) + c_1 \left( \sqrt{V(\mathbf{x})}\eta_v + \sqrt{D(\mathbf{x})}\eta_d \right) \quad (2)$$

Here,  $\eta_v$  and  $\eta_d$  are independent Gaussian white noises and  $c_1 = 0.01$  is a multiplicative constant which controls the amplitude of the molecular noise. The scheme was adopted from [1].

## References

- [1] T. Schaffter, D. Marbach, and Floreano D. Genenetweaver: In silico benchmark generation and performance profiling of network inference methods. *Bioinformatics*, 26:2263–70, 2011.
